# Supplementary material for: Potential mechanical transmission of Lumpy skin disease virus (LSDV) by the stable fly (Stomoxys calcitrans) through regurgitation and defecation
Source: PubMed Central journal article supplement — Curr Res Insect Sci. 2020 Dec 17;1:100007. doi: 10.1016/j.cris.2020.100007 (PMC9387481; doi:10.1016/j.cris.2020.100007), 2020-12-17
Supplement: mmc1.pdf [file mmc1.pdf]

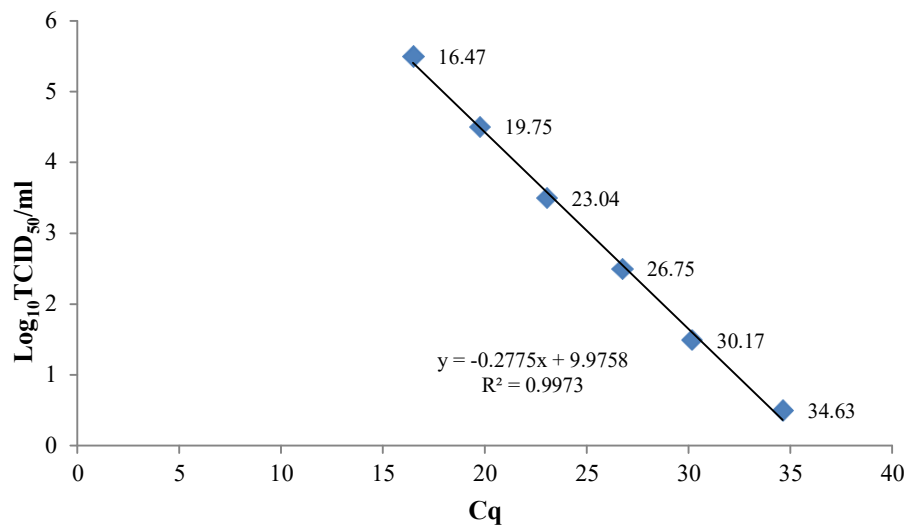

**Figure S1.** Standard curve for LSDV Macedonia 2016 field strain (Möller et al., 2019) Conversion of viral DNA ( $\text{Cq}$  values) into  $\text{log}_{10}\text{TCID}_{50}/\text{ml}$  was determined.
