# Supplementary material for: Potential mechanical transmission of Lumpy skin disease virus (LSDV) by the stable fly (Stomoxys calcitrans) through regurgitation and defecation
Source: PubMed Central journal article supplement — Curr Res Insect Sci. 2020 Dec 17;1:100007. doi: 10.1016/j.cris.2020.100007 (PMC9387481; doi:10.1016/j.cris.2020.100007), 2020-12-17
Supplement: mmc2.pdf [file mmc2.pdf]

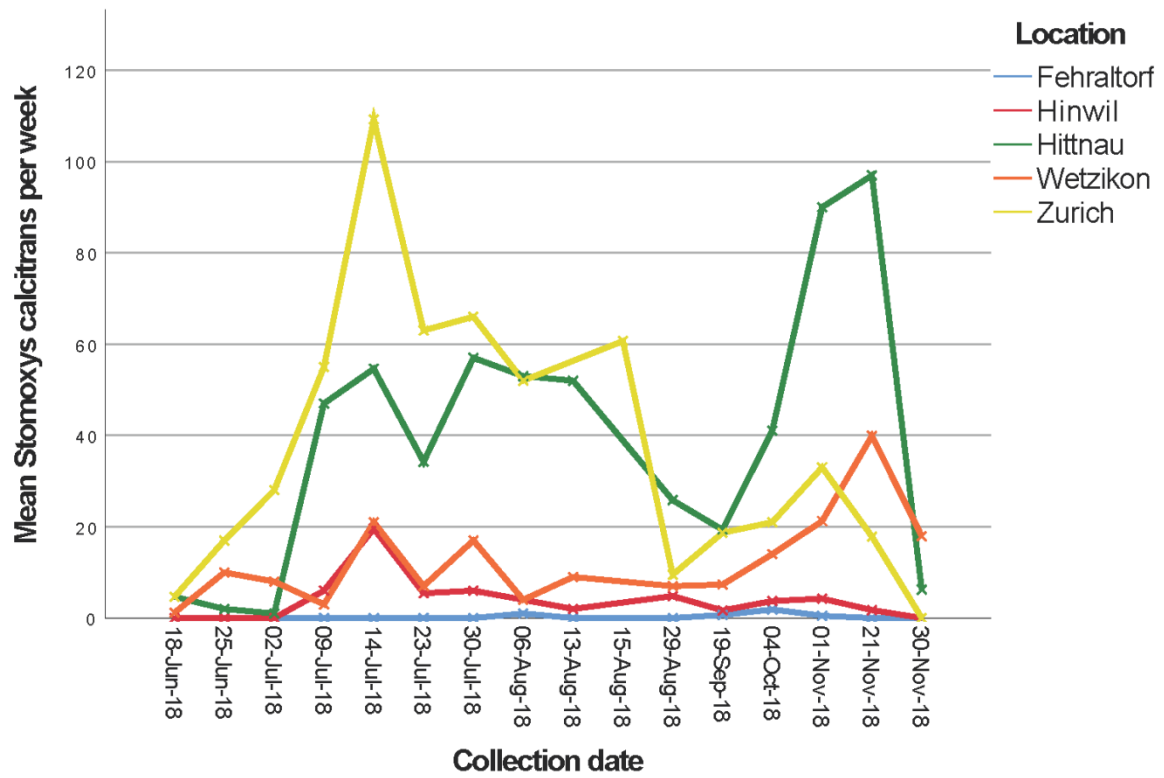

**Figure S2.** The calculated mean number of *Stomoxys calcitrans* collected per week by sticky white traps at 5 locations in 2018, for site descriptions, see Table 1.
